# Supplementary material for: An Intramolecular Salt Bridge Linking TDP43 RNA Binding, Protein Stability, and TDP43-Dependent Neurodegeneration
Source: PubMed Central journal article supplement — Cell Rep. Author manuscript; Available in PMC 2019 May 3. (PMC6499398; doi:10.1016/j.celrep.2019.03.093), 2019-04-23
Supplement: NIHMS1527713-supplement-1.pdf [file NIHMS1527713-supplement-1.pdf]

**Cell Reports, Volume 27**

**Supplemental Information**

**An Intramolecular Salt Bridge Linking TDP43**

**RNA Binding, Protein Stability, and**

**TDP43-Dependent Neurodegeneration**

**Brittany N. Flores, Xingli Li, Ahmed M. Malik, Jose Martinez, Asim A. Beg, and Sami J. Barmada**

# Figure S1

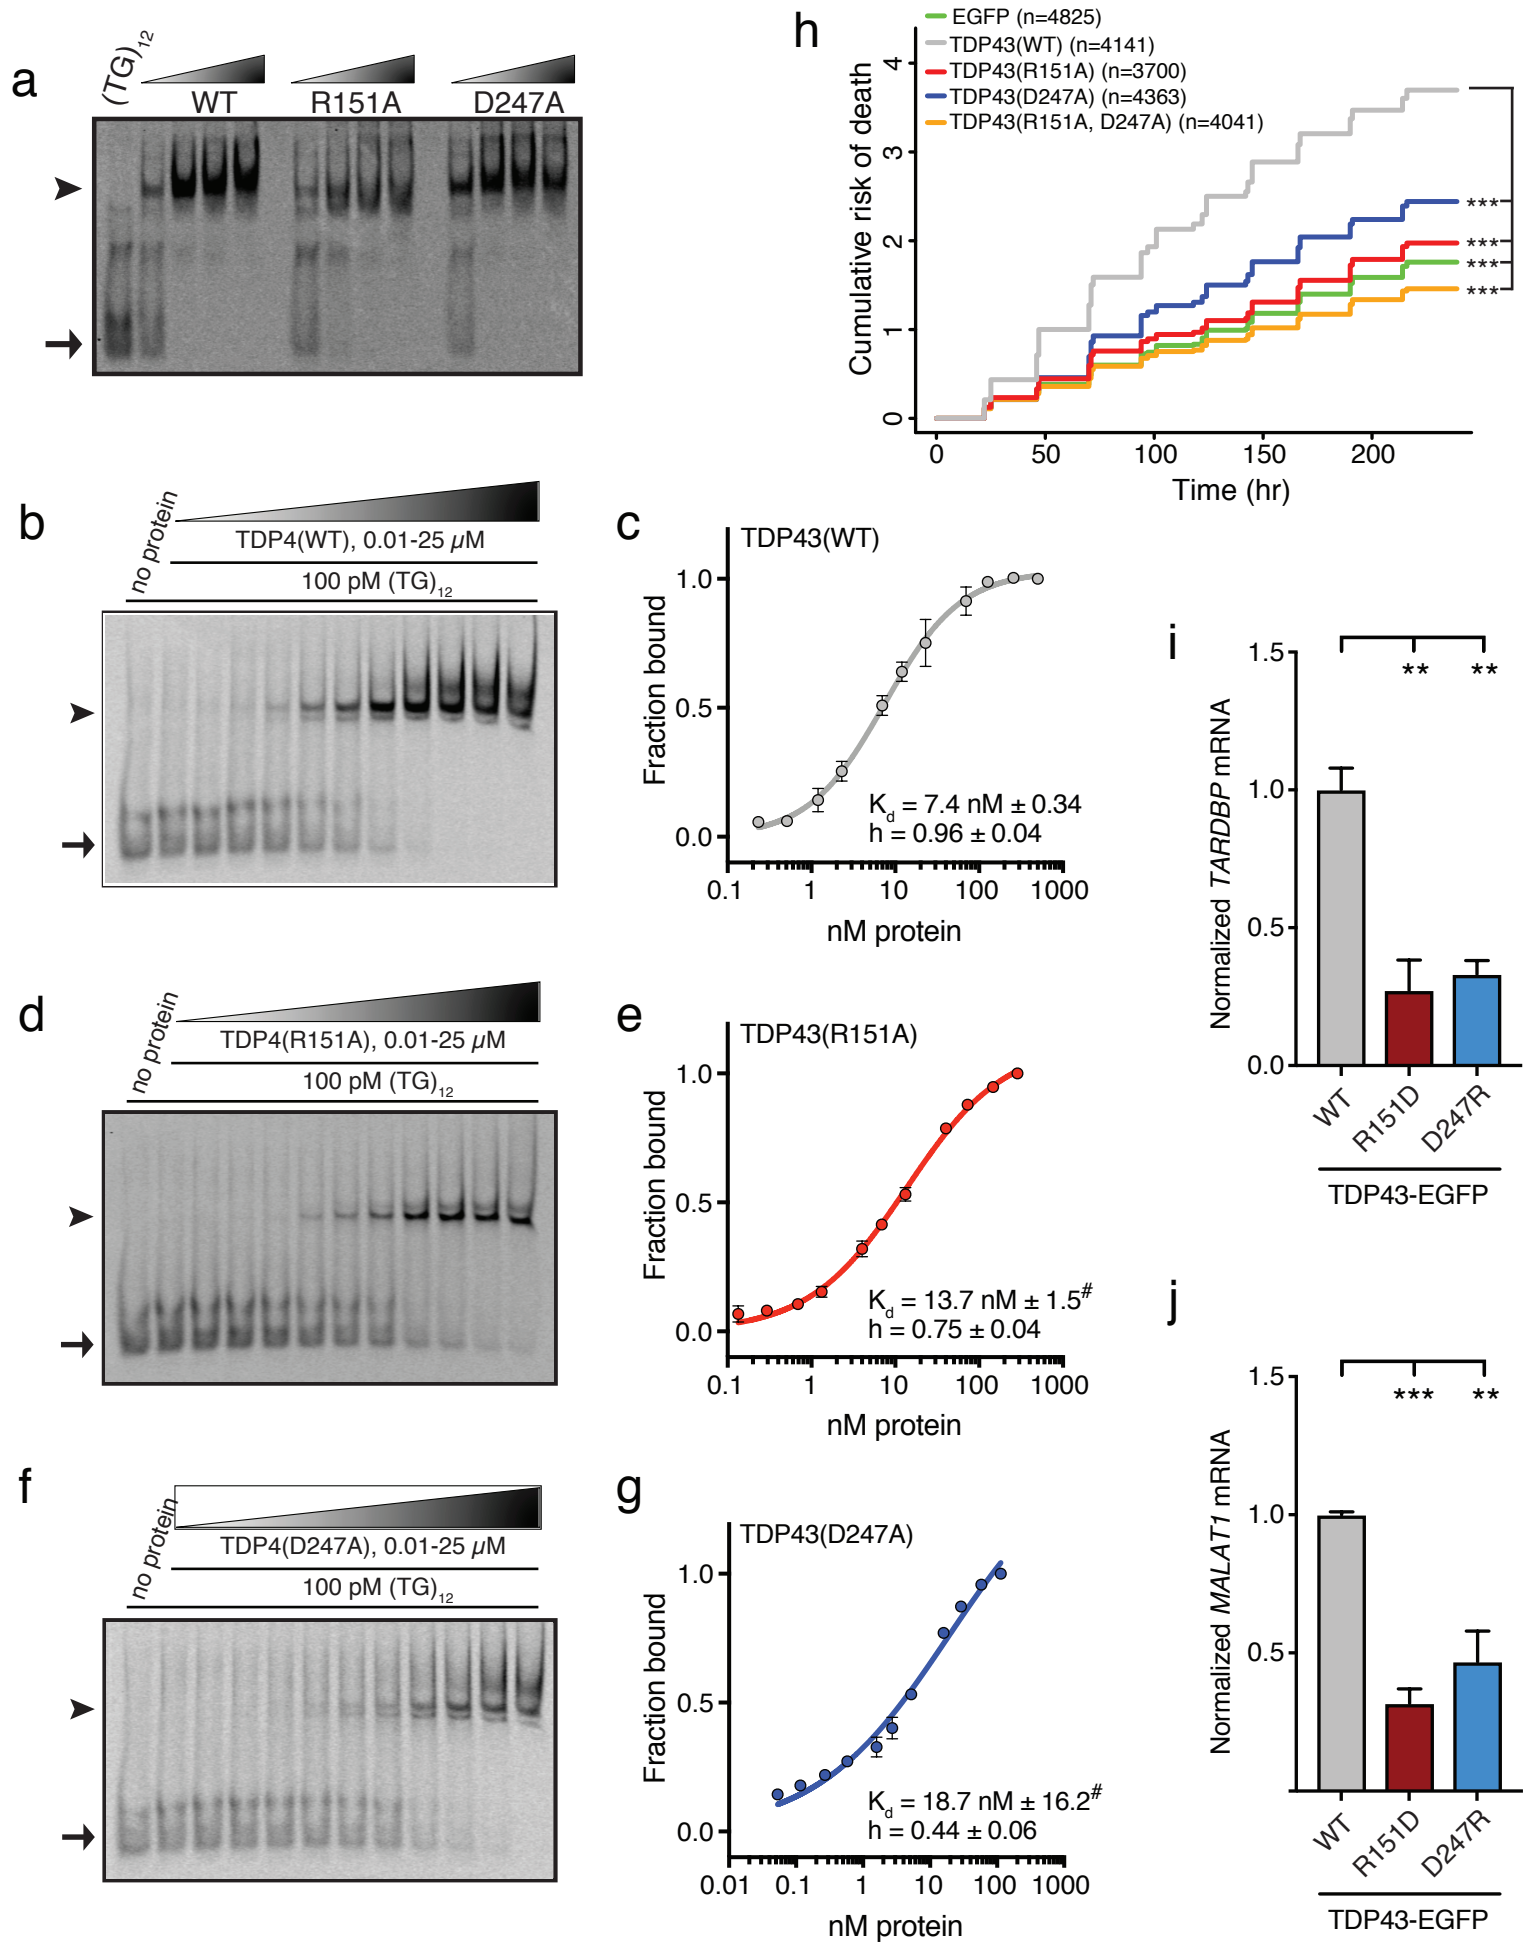

**Figure S1. Salt bridge disrupting mutations impair DNA binding by TDP43 and interfere with TDP43-dependent toxicity, related to Figures 1 and 5.** **a**, EMSA of recombinant TDP43 variants at increasing protein concentrations (12 fmol to 4 pmol) incubated with labeled (TG)<sub>12</sub> oligonucleotides (100 pM). **b, d, f**, Labeled (TG)<sub>12</sub> oligomers were added (100 pM) to increasing protein concentrations (0.01-25 μM). Three independent replicates for each protein were quantified in **c, e, g** to calculate dissociation constants ( $K_d$ ) and Hill slopes. For **a, b, d, f**, arrowheads mark protein-DNA complexes, while arrows indicate free DNA oligomers. For **c, e, and g**,  $K_d$  and Hill coefficient were determined by the nonlinear least squares regression fit equation, and each plot displays mean ± SEM; #,  $p < 0.01$  for comparison with TDP43(WT), extra sum-of-squares F test. **h**, Overexpressing TDP43(WT)-EGFP significantly enhances the cumulative risk of death compared to EGFP-expressing neuron (HR=2.43,  $p < 2 \times 10^{-16}$ ). Individual mutations that disrupt the salt bridge (R151A or D247A) significantly reduce toxicity compared to TDP43(WT)-expressing neurons (HR=0.47, and 0.58, respectively,  $p < 2 \times 10^{-16}$  for both comparisons). Expression of TDP43(R151A, D247A)-EGFP significantly abrogates toxicity compared to TDP43(WT)-expressing neurons (HR=0.36,  $p < 2 \times 10^{-16}$ ). n, number of neurons. \*\*\*  $p < 2 \times 10^{-16}$ , Cox proportional hazards. Survival analyses were collected from 3 independent experiments, with 8 wells per condition for each replicate. **i** and **j**, HEK293T cells were transfected with TDP43(WT), TDP43(R151D), or TDP43(D247R) and immunoprecipitated with antibodies against GFP. Bound *TARDBP* (**i**) or *MALAT1* (**j**) transcripts were amplified from total RNA by qRT-PCR. Data were pooled from 3 independent replicates. Plots show mean ± SEM, \*\*  $p < 0.05$ , Kruskal-Wallis with Dunn's test.

**Figure S2**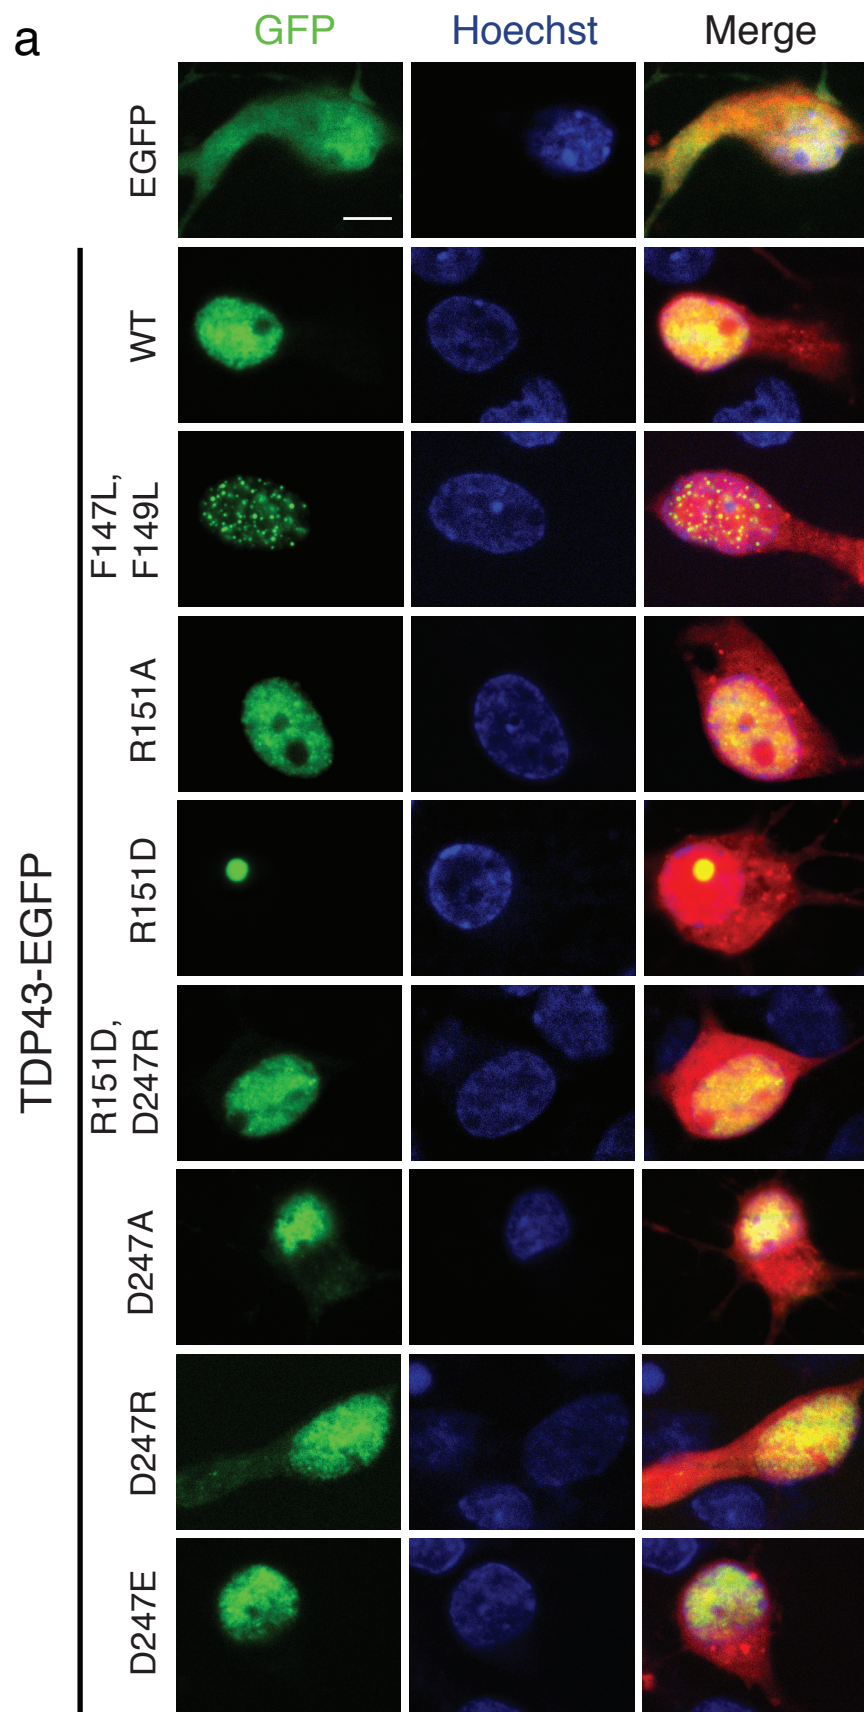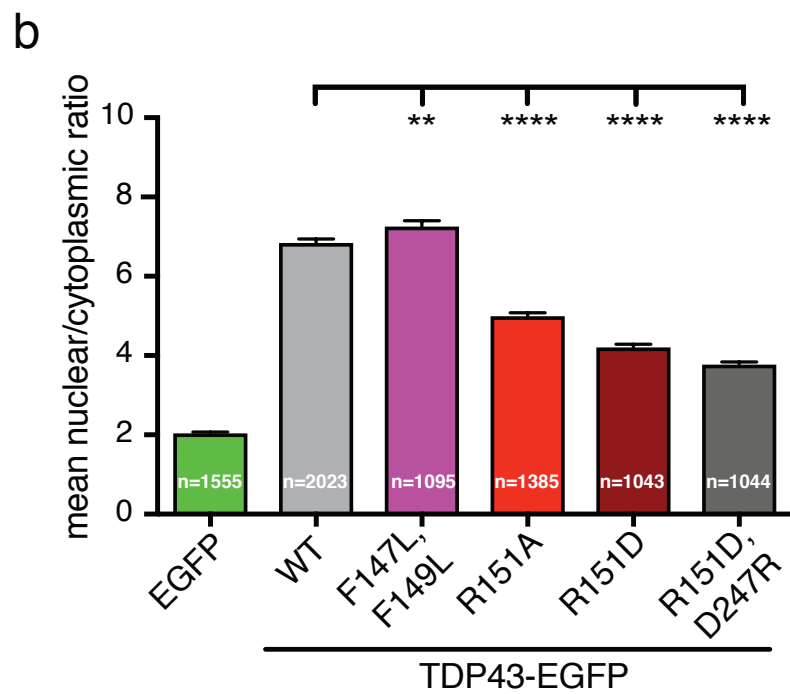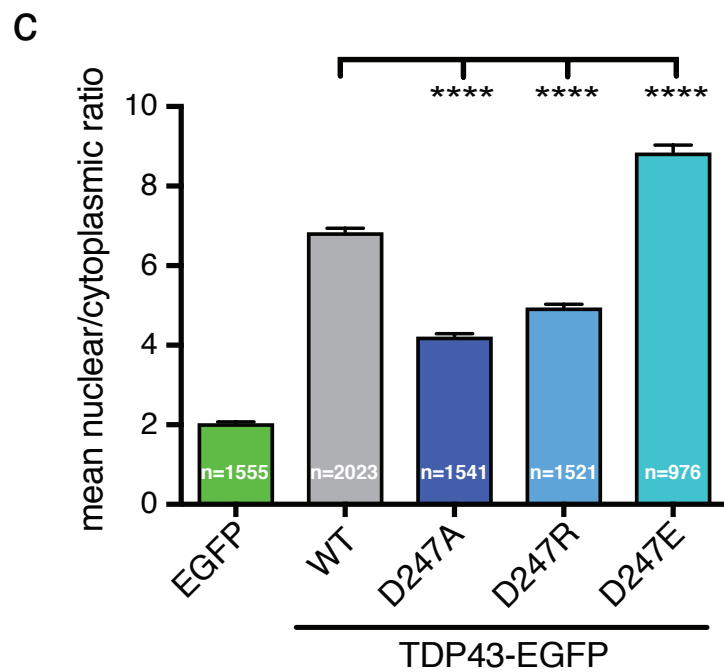

**Figure S2. Manipulating the RRM1-RRM2 salt bridge affects subcellular TDP43 localization, related to Figure 2.** **a**, Fluorescent microscopy of primary neurons expressing EGFP-tagged TDP43 variants. Nuclei were stained with a dye (4',6-diamidino-2-phenylindole (DAPI)). Scale bar: 5  $\mu$ m. **b** and **c**, Subcellular TDP43-EGFP localization was quantified by measuring the fluorescence intensity of TDP43 within the nuclear and cytoplasmic compartments separately for each neuron. The mean nuclear-cytoplasmic ratio (NCR) for TDP43(WT) was  $6.9 \pm 0.087$ . **b**, All variants of R151 significantly decreased the TDP43-EGFP NCR. **c**, Mutating D247 to either alanine or arginine decreased the NCR, while mutating D247 to glutamate significantly increased TDP43-EGFP NCR. Data in **b** and **c** represent at least 3 independent experiments, \*\*\*\*  $p < 0.0001$ , one-way ANOVA with Dunnett's post-hoc. Plots in **b**, **c** show mean  $\pm$  SEM; n, number of neurons.

# Figure S3

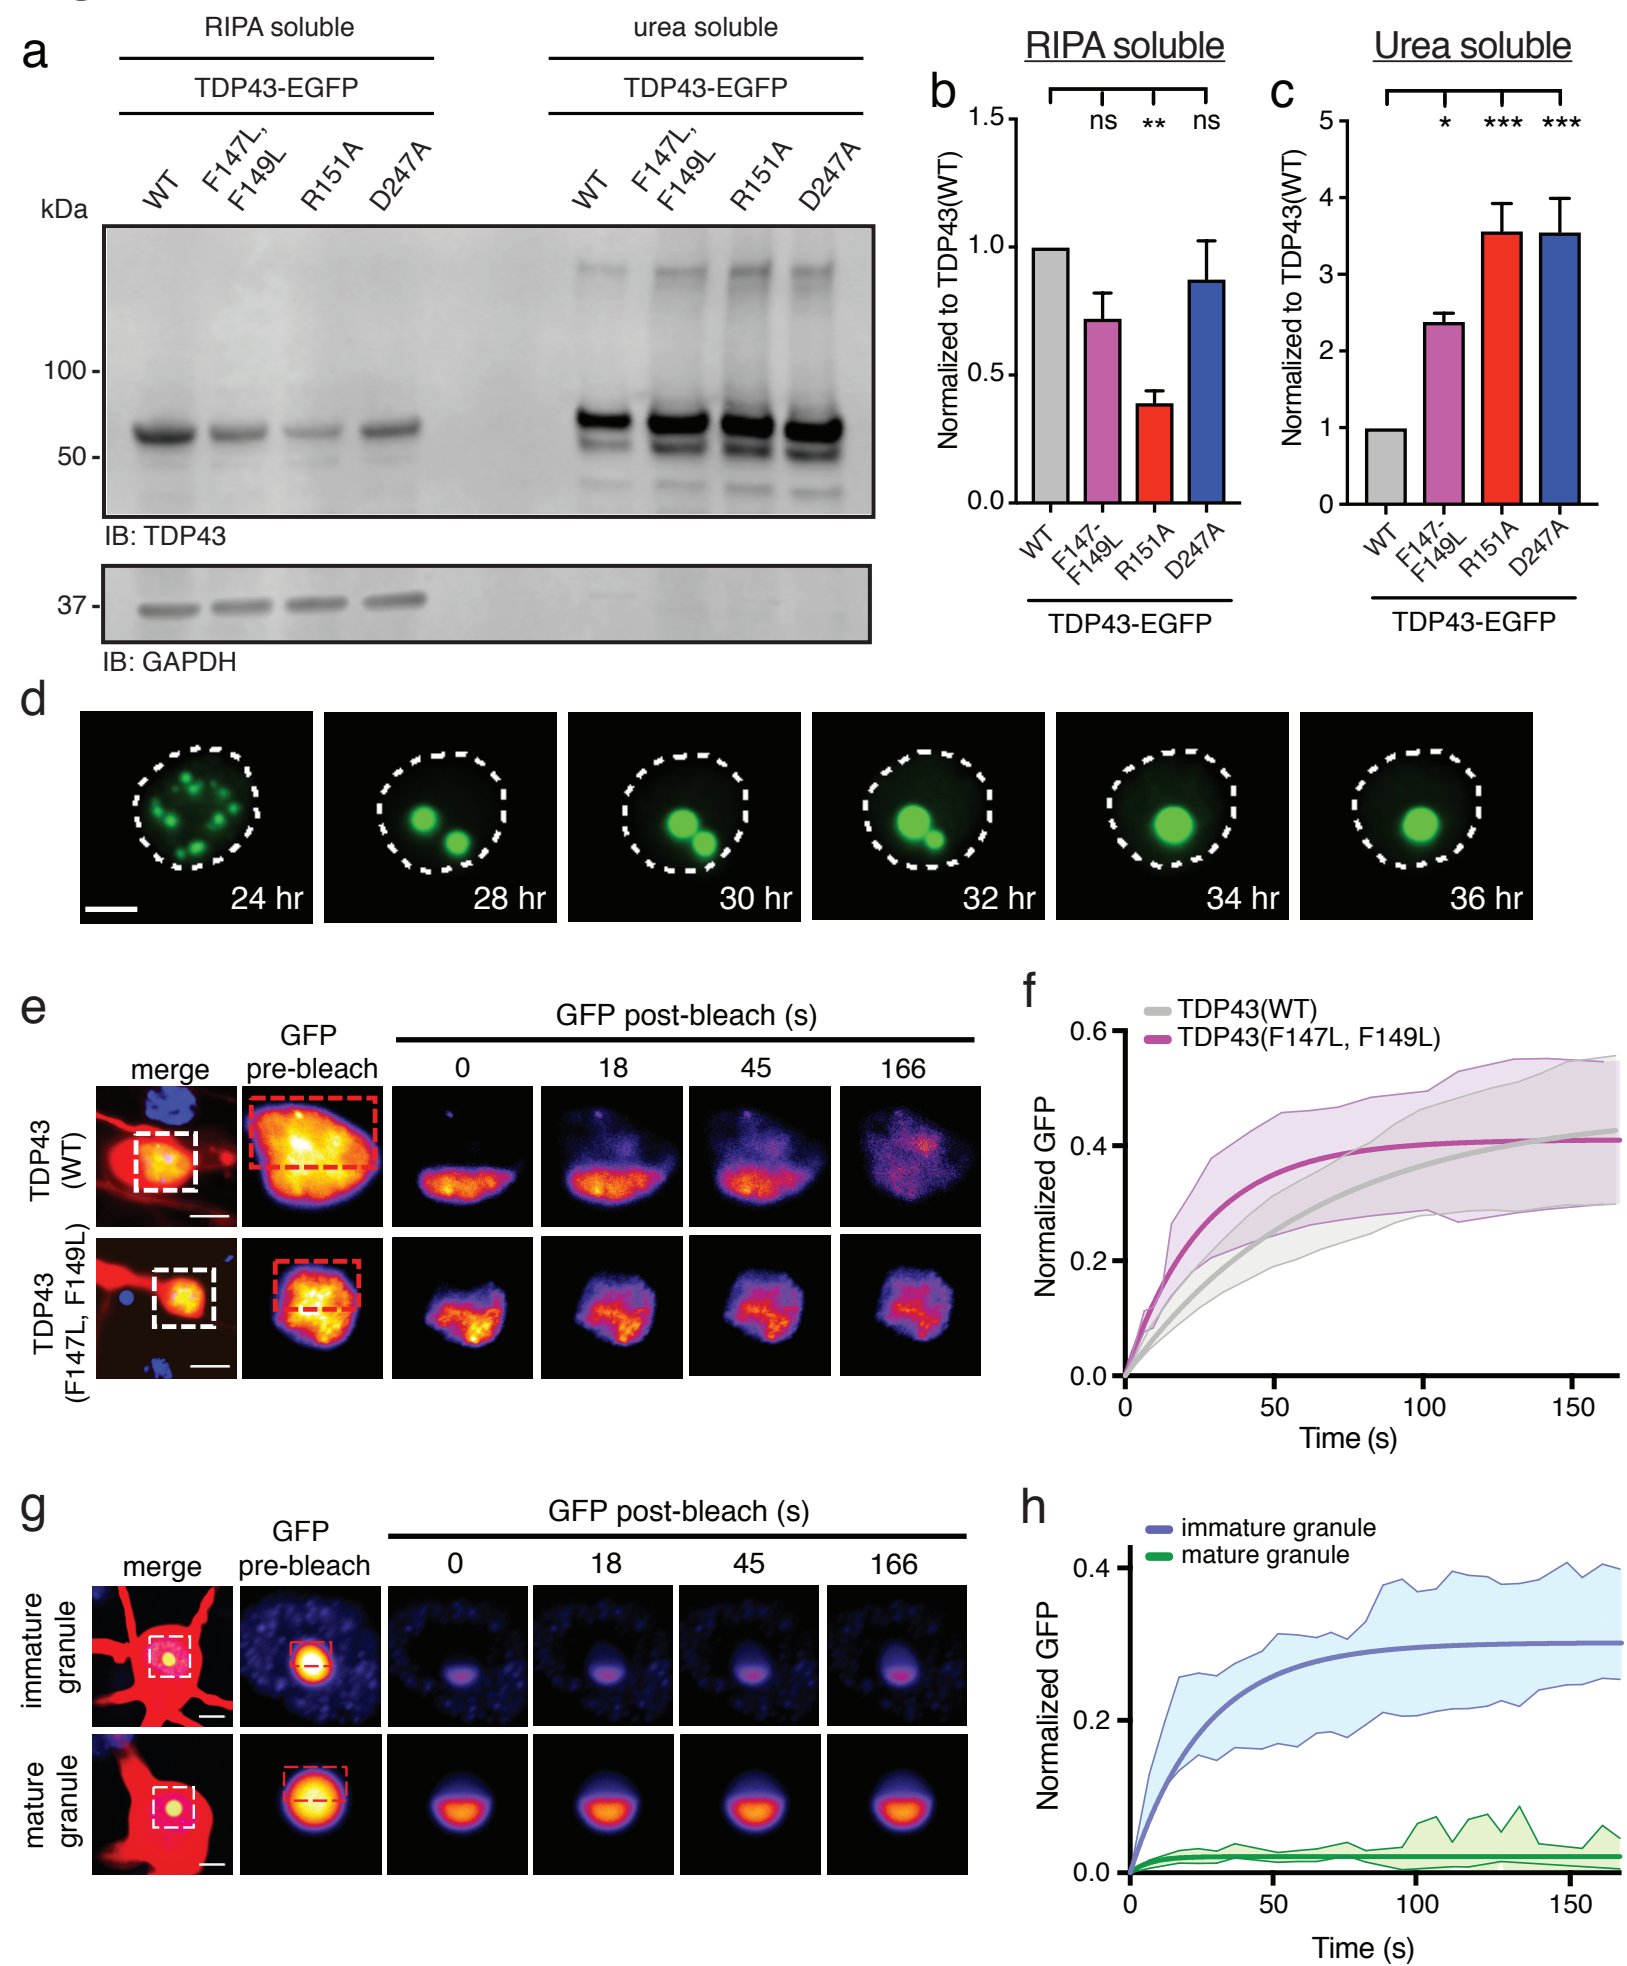

**Figure S3. Mutations that interfere with RNA binding reduce solubility and elicit liquid-liquid and liquid-gel phase transitions, related to Figure 2.** **a**, HEK293T cells were transfected with TDP43 variants, sonicated in RIPA buffer or extracted with urea buffer as indicated, and immunoblotted with anti-TDP43 antibodies. **b, c** Each TDP43 mutant was enriched within the urea-soluble fraction, compared to TDP43(WT). Data represent 3 independent replicates, \*\*\*  $p < 0.0001$ , one-way ANOVA with Dunnett's post-hoc. Plots in **b, c** show mean  $\pm$  SEM. **d**, TDP43(F147L, F149L)-EGFP shows time-dependent changes in distribution from diffuse to small puncta, which then fuse over time into large droplets consistent with liquid-like behavior. Scale bar: 5  $\mu\text{m}$ . **e** and **f**, TDP43(F147L, F149L)-EGFP that has not phase separated and is still relatively diffuse in the nucleus shows no difference in its mobility compared to TDP43(WT)-EGFP (diffuse TDP43(WT)  $n = 4$ , diffuse TDP43(F147L, F149L)  $n = 5$ ). **g** and **h**, Immature granules into which not all of the TDP43 has yet coalesced show internal rearrangement by fluorescence recovery after photobleaching (FRAP), consistent with liquid-liquid phase separated granules, but mature granules are nearly completely immobile (immature granules  $n = 3$ , mature granules  $n = 5$ ). Scale bar: 10  $\mu\text{m}$ . Data represent 3 independent replicates.

# Figure S4

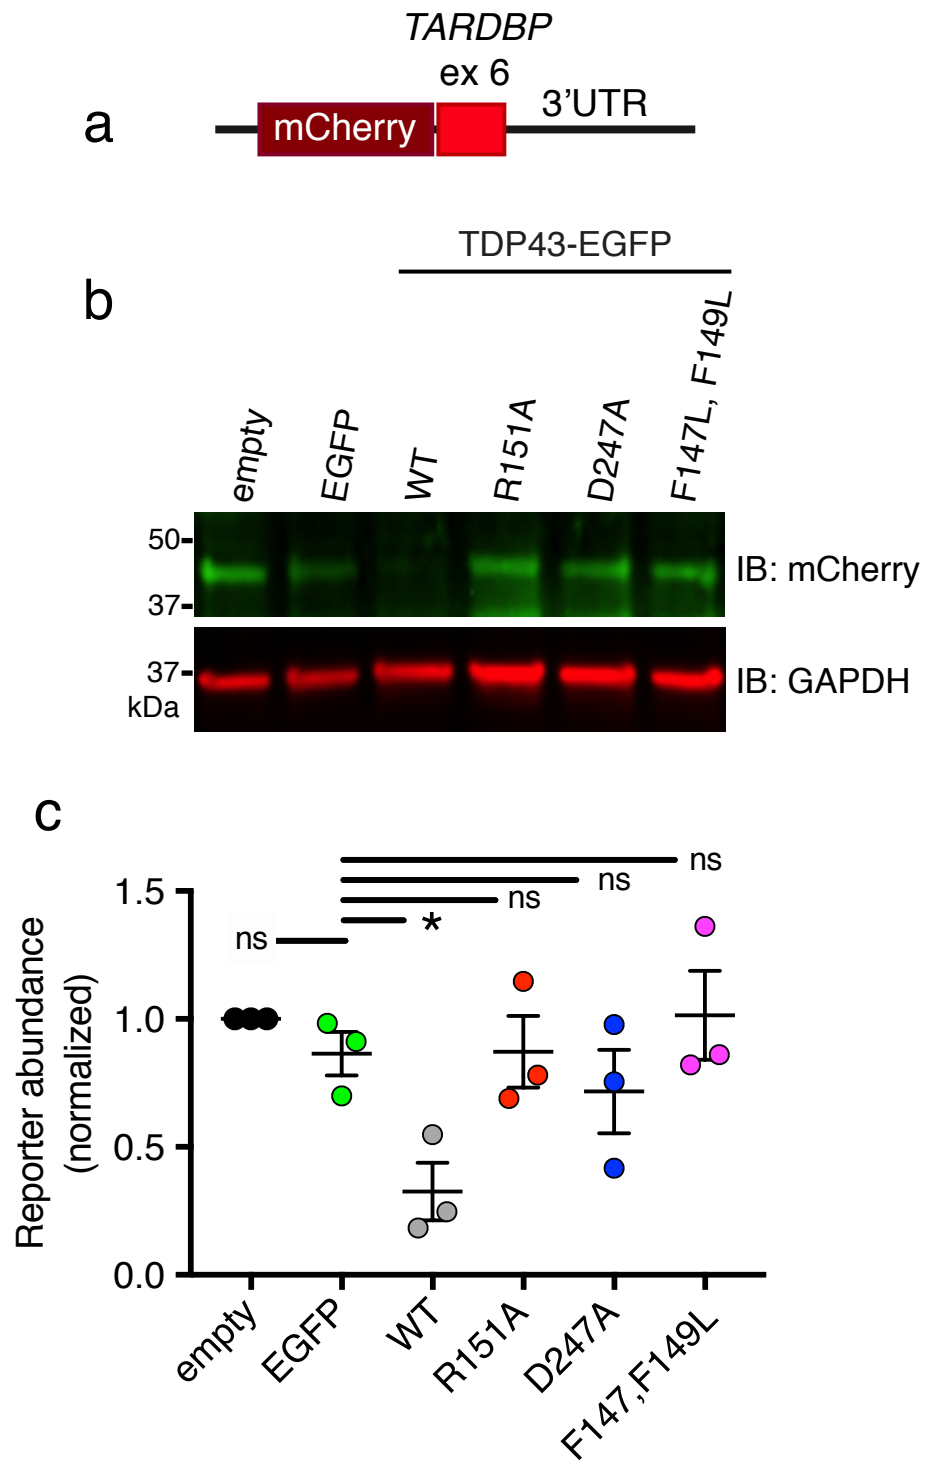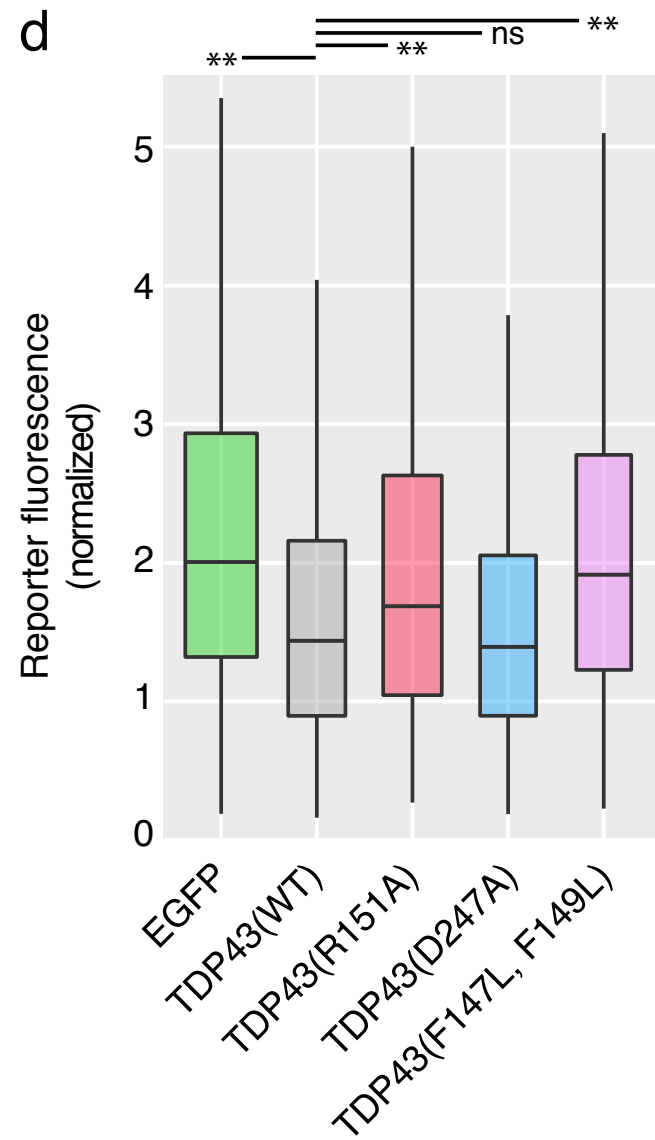



**Figure S4. Salt bridge-disrupting mutations prevent TDP43 autoregulation, related to Figure 2.** **a**, Schematic illustration of a fluorescent TARDBP autoregulation reporter, consisting of mCherry located upstream *TARDBP* exon 6 and 3'UTR. **b**, HEK293T cells were co-transfected with the reporter and TDP43-EGFP variants, then immunoblotted with mCherry and GAPDH antibodies (**c**) or imaged by automated microscopy (**d**). Overexpression of TDP43(WT)-EGFP significantly reduced reporter abundance compared to EGFP in HEK293T cells (**c**) and primary neurons (**d**). Data represent 3 independent replicates, \*\*  $p < 0.001$ , one-way ANOVA with Dunnett's post-hoc.

# Figure S5

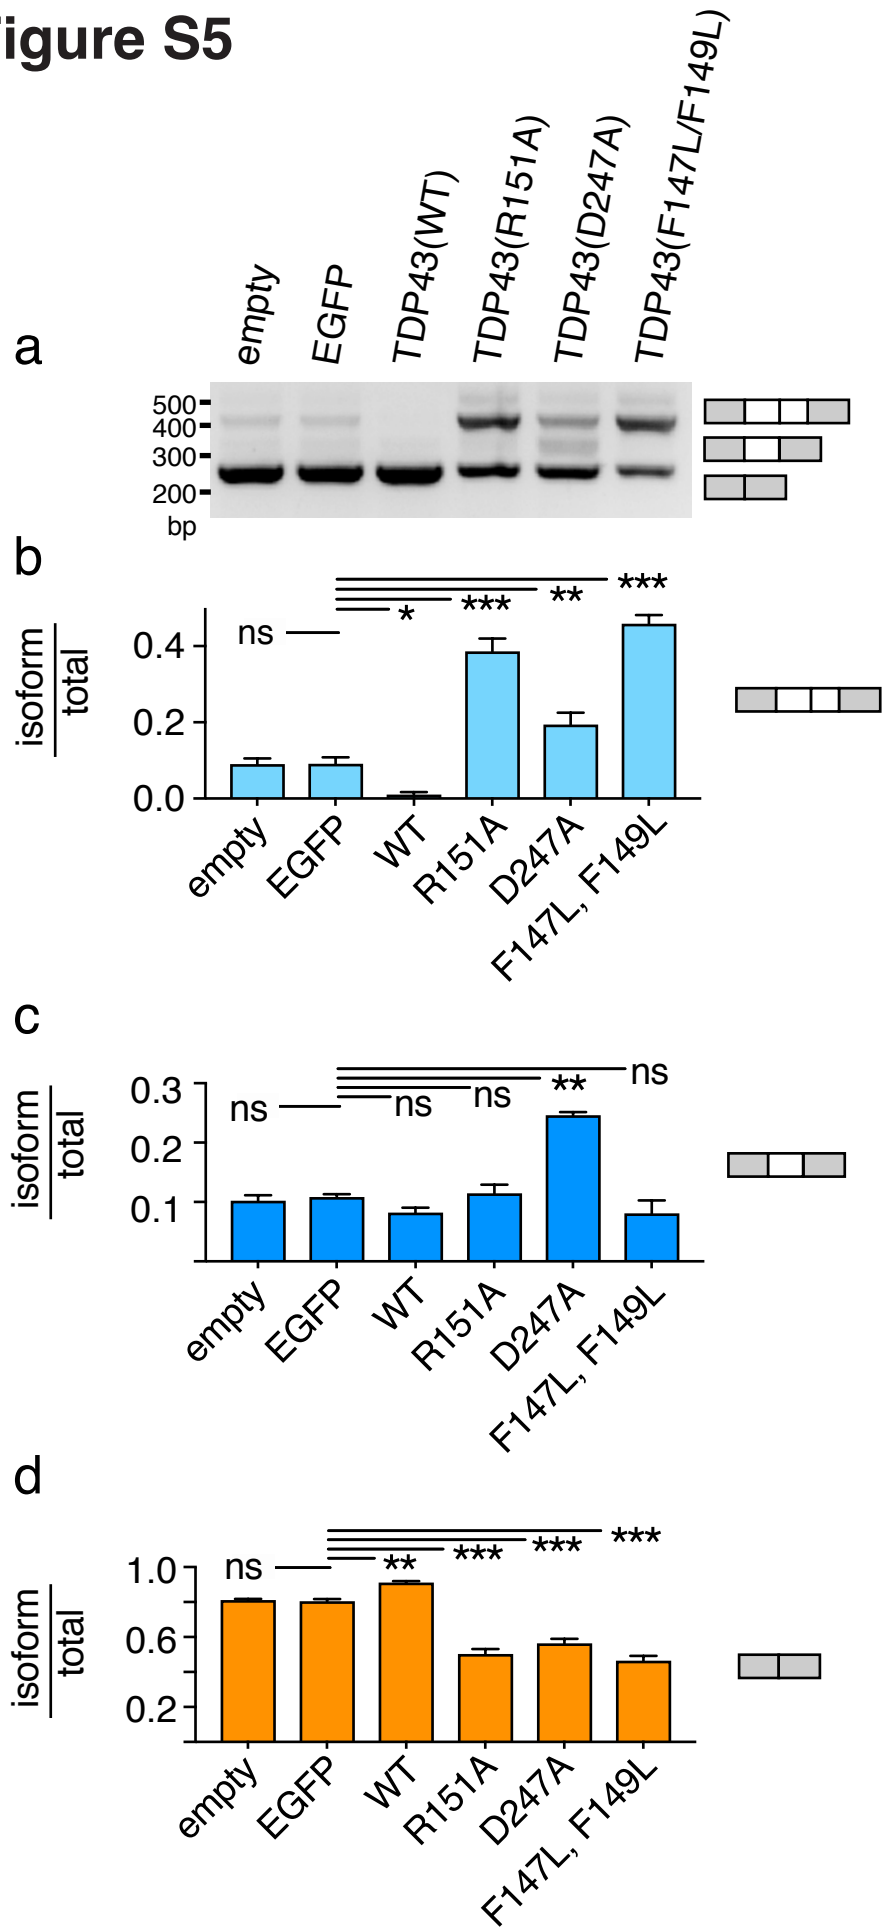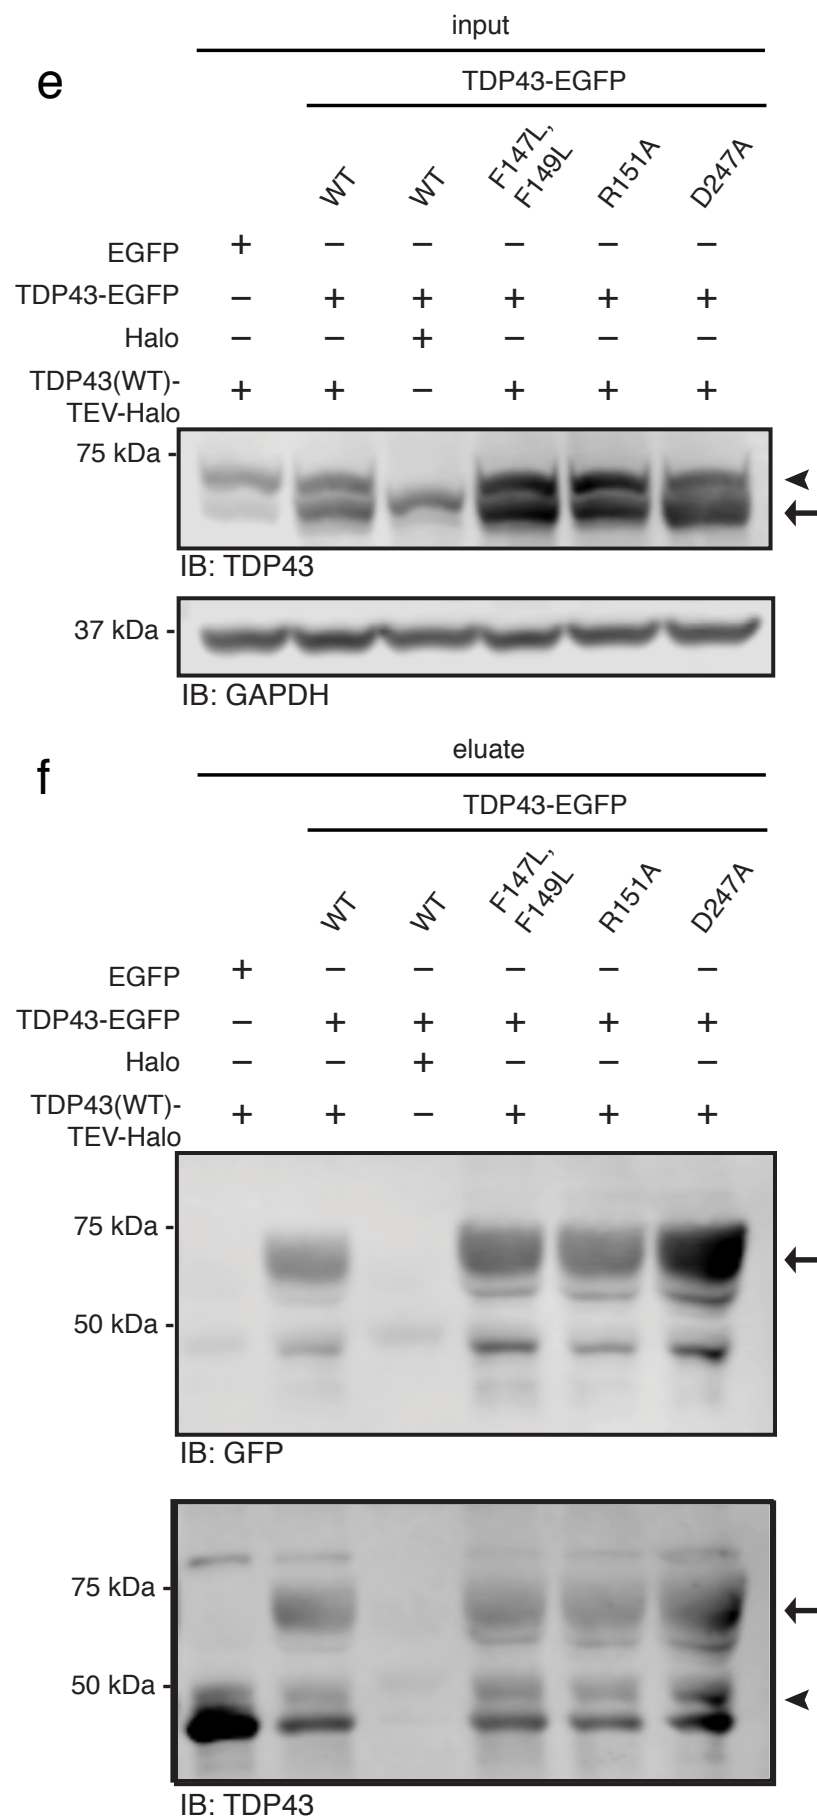

**Figure S5. Overexpression of RNA binding-deficient TDP43 mutants impair TDP43-dependent splicing and physically interact with wild-type TDP43, related to Figure 2.** **a**, *CFTR* minigene splice products in HEK293 cells overexpressing EGFP or EGFP-tagged TDP43 variants. The top band represents exon 9 inclusion, the bottom band shows complete exon 9 exclusion, and the middle band arises from a cryptic splice event within exon 9. **b-d**, Quantification for each *CFTR* isoform. While TDP43(WT)-EGFP overexpression led to an increase in exon 9 exclusion, mutations disrupting RNA binding significantly decreased the proportion of transcripts with exon 9 exclusion. Data was pooled from 3 independent replicates, \*  $p < 0.05$ , \*\*  $p < 0.01$ , \*\*\*  $p < 0.0001$ ; 2-way ANOVA with Dunnett's multiple comparison test. **e**, HEK293 cells co-expressing TDP43(WT)-HaloTag and EGFP-tagged TDP43(WT), TDP43(F147L, F149L), TDP43(R151A), or TDP43(D247A). Input samples were immunoblotted with anti-TDP43 and -GAPDH antibodies. **f**, HaloTag or TDP43(WT)-HaloTag was eluted with HaloLink, and eluates immunoblotted with anti-GFP and -TDP43 antibodies. TDP43(WT)-HaloTag associated with all TDP43-EGFP variants as detected by the ~75 kDa band corresponding to TDP43-EGFP in each lane. For **e** and **f**, arrow points to TDP43-EGFP. Arrowhead indicates TDP43-HaloTag for (**e**) and native TDP43 for (**f**). Immunoblots are representative of 3 biological replicates.

# Figure S6

**a**

|                     |     |                                                |                                                 |          |           |
|---------------------|-----|------------------------------------------------|-------------------------------------------------|----------|-----------|
| <i>Homo Sapiens</i> | 111 | LPWKTTEQDLKEYFSTFGEVLMVQVKKDLKTGHSKGF          | <b>RFTEYETQVKVM</b>                             | -SQRHMID | 169       |
| <i>Mus</i>          | 111 | LPWKTTEQDLKDYFSTFGEVLMVQVKKDLKTGHSKGF          | <b>RFTEYETQVKVM</b>                             | -SQRHMID | 169       |
| <i>Pongo</i>        | 111 | LPWKTTEQDLKEYFSTFGEVLMVQVKKDLKTGHSKGF          | <b>RFTEYETQVKVM</b>                             | -SQRHMID | 169       |
| <i>Xenopus</i>      | 112 | LPWKTTEQDLKDYFSTFGEVIMVQVKKDAKTGHSKGF          | <b>RFADYETQVKVM</b>                             | -SQRHMID | 170       |
| <i>C. elegans</i>   | 180 | VDFKTTDECFQKYFEDIGTVVFC <b>EI</b> KRK-SDGNSKGF | <b>RV</b> MSSVGE <b>Q</b> NKVLAIPQH <b>M</b> ID |          | 238       |
|                     |     | : : *** : :                                    | : : * : *                                       | : *      | : : * : * |

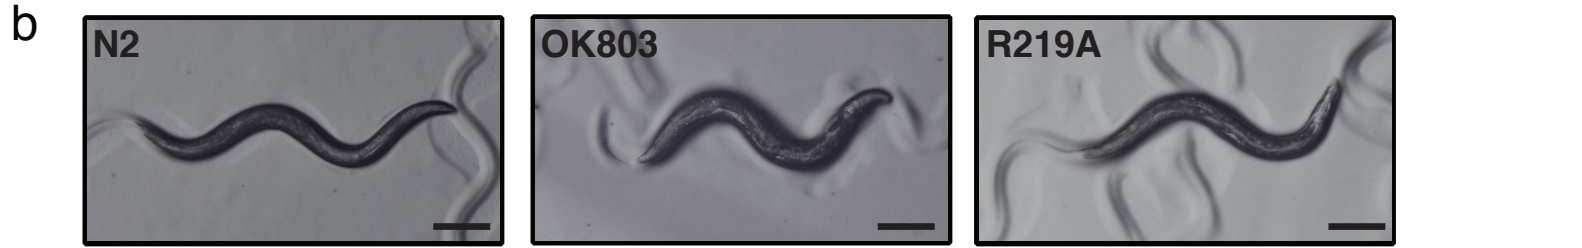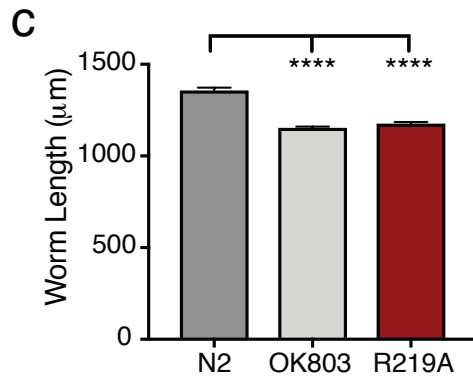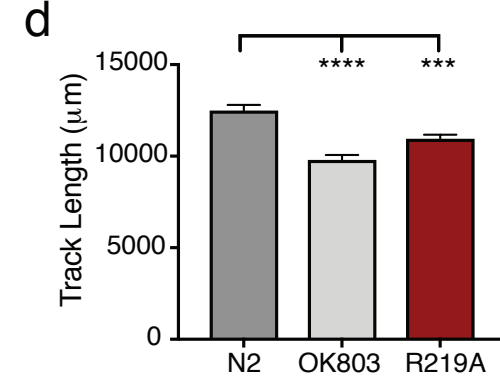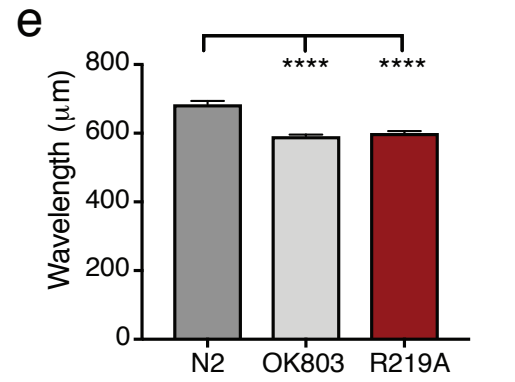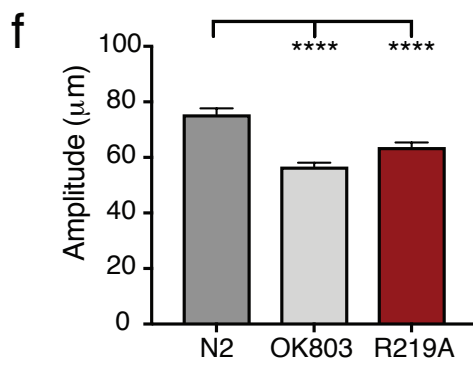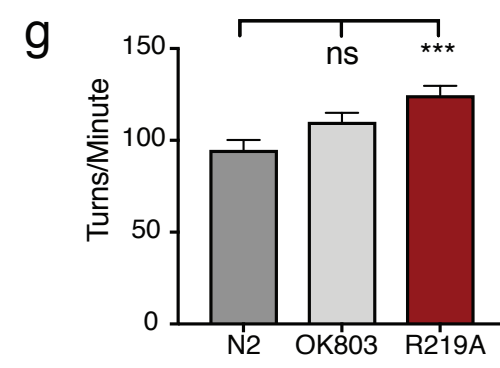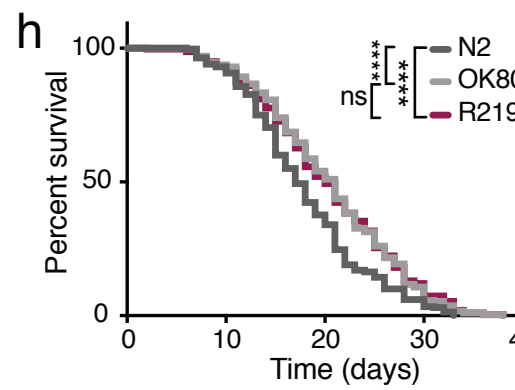

**Figure S6. The *tdp-1*(R219A) knock-in phenocopies TDP-1 null mutations in *C. elegans*, related to Figure 2.** **a**, Interspecies sequence conservation of TDP43's RRM1 domain. Highly conserved residues are highlighted in green. Conservation of R151 (in bold) is highlighted. **b**, Representative images of 7d old wild-type (N2), *tdp-1* (*ok803*) knockout, and mutant *tdp-1* (R219A) animals. Scale bar: 200  $\mu$ m. **c-f**, Behavioral assays of 7d-old animals measuring worm length, track length, wavelength, and amplitude on NGM plates. Both *ok803* and R219A animals displayed significantly reduced locomotor metrics compared to N2 animals on NGM plates. **g**, Thrash assay measuring the number of body bends per minute in liquid media. R219A, but not *ok803*, animals displayed a significant increase in the number of body bends per minute compared to N2. **h**, An increase in survival was observed for both *ok803* and R219A animals compared to N2, but no significant difference was observed between *ok803* and R219A worms. **c-f**, data were pooled from 3 independent experiments, totaling  $n \geq 127$  animals/genotype; \*\*\*\*  $p < 0.0001$ , one-way ANOVA, Dunnett's post-hoc. **g**, data were pooled from 3 independent experiments, totaling  $n \geq 96$  animals/genotype; \*\*\*\*  $p < 0.001$ , one-way ANOVA, Dunnett's post-hoc. **h**, data were pooled from 3 replicates, totaling 418 animals/genotype; \*\*\*\*  $p < 0.0001$ , log-rank test. Plots in **c-g** show mean  $\pm$  SEM.

**Figure S7**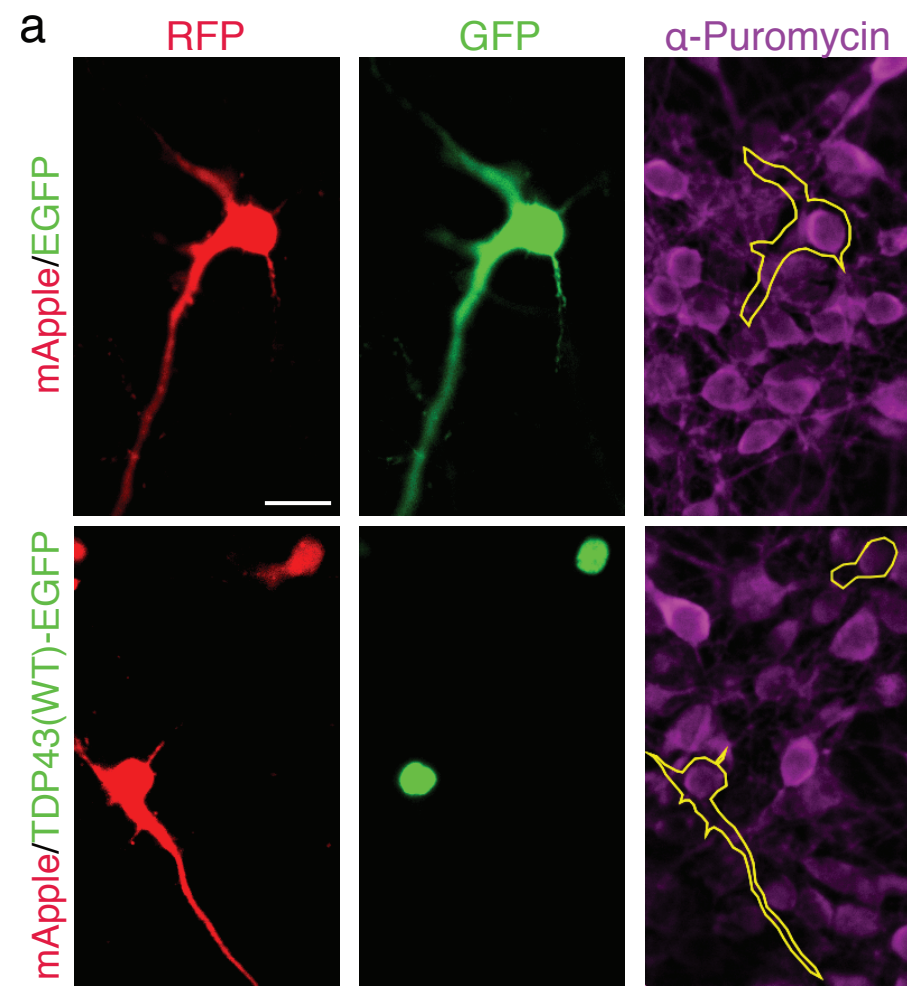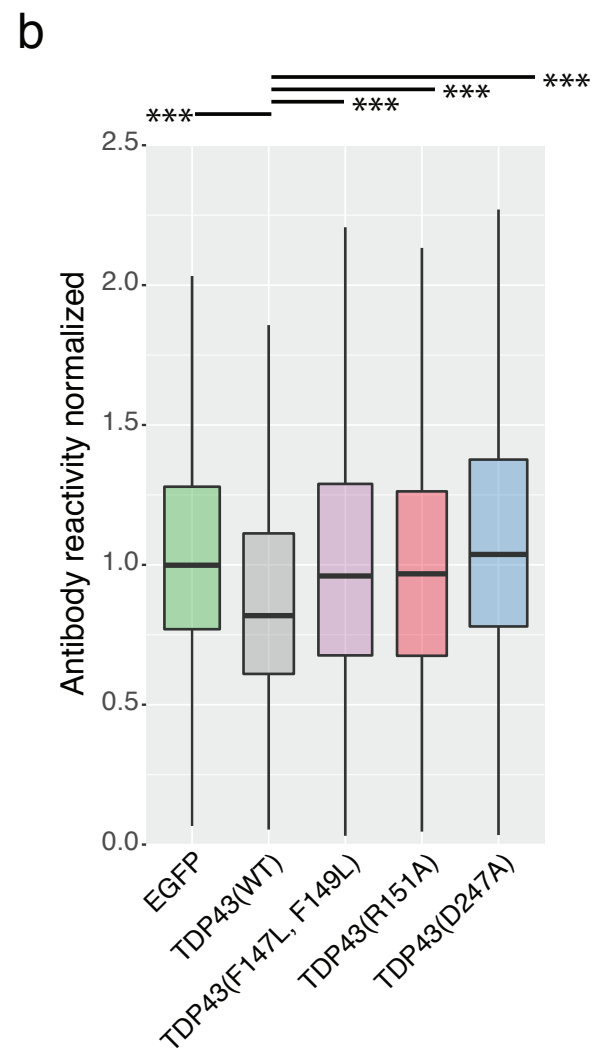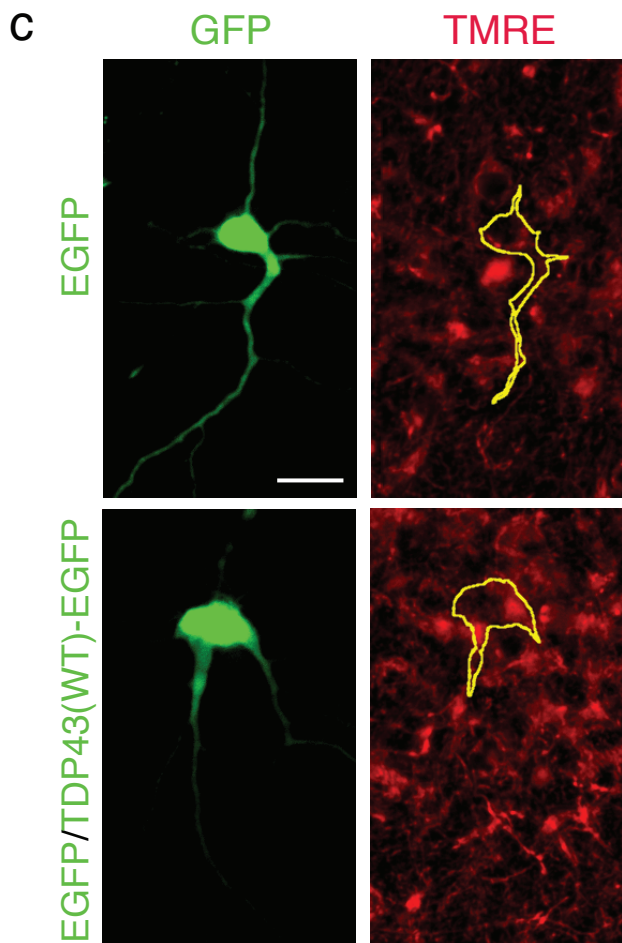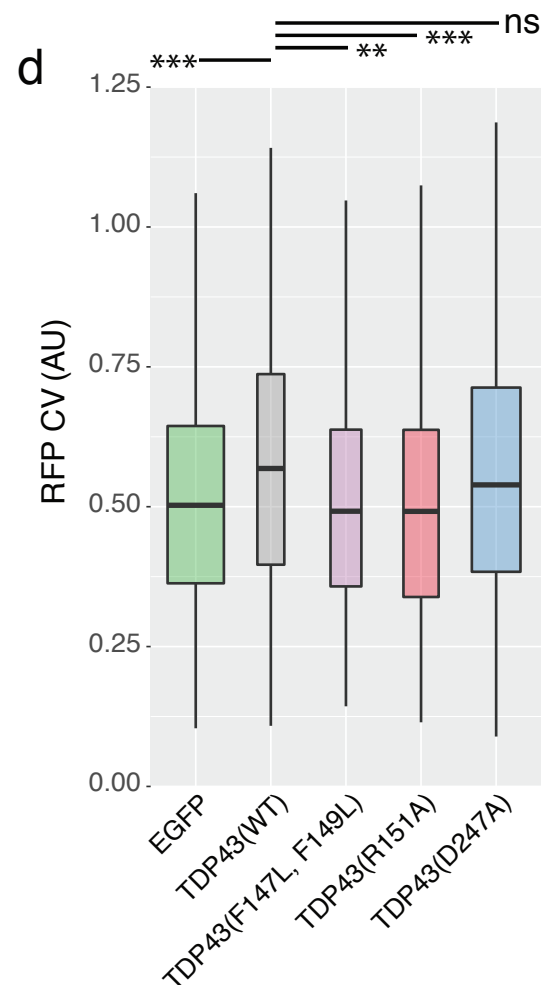

**Figure S7. Protein synthesis and mitochondria morphology are altered in TDP43(WT)-expressing neurons, related to Figures 6 and 7.** **a**, Primary neurons were co-transfected with mApple and TDP43(WT)-EGFP or EGFP alone, treated with 1  $\mu$ g/mL puromycin, and stained with puromycin antibodies. Yellow lines outline the cell bodies. **b**, TDP43(WT)-expressing neurons reduced protein synthesis by SUnSET. **c**, Fluorescent images of representative neurons overexpressing EGFP or TDP43(WT)-EGFP and EGFP and stained with the mitochondrial dye TMRE, demonstrating changes in mitochondria morphology in TDP43(WT)-expressing neurons. **d**, TDP43(WT)-EGFP and TDP43(D247A)-EGFP displayed elevated mitochondrial CV compared to EGFP. Data were collected from 2 independent experiments, \*\*\* $p < 0.01$ , one-way ANOVA with Tukey's test. Scale bar: 20  $\mu$ m.

**Table S1. Gene ontology of abnormally spliced transcripts, related to Figure 7.**

| KEGG Term            | p                     | FE  | Bonf.                 | Benj.                 | FDR                   | Genes                                                                                                                                                                                                                                                                                                                                                                                                                                                 |
|----------------------|-----------------------|-----|-----------------------|-----------------------|-----------------------|-------------------------------------------------------------------------------------------------------------------------------------------------------------------------------------------------------------------------------------------------------------------------------------------------------------------------------------------------------------------------------------------------------------------------------------------------------|
| Ribosome             | $6.6 \times 10^{-17}$ | 3.0 | $3.1 \times 10^{-14}$ | $3.1 \times 10^{-14}$ | $1.4 \times 10^{-13}$ | RPL18, RPL17, RPL19, RPL14, RPL13, RPS27L, RPS2, RPS3, RPLP0, RPLP1, RPL10, RPL11, RPL12, MRPL32, MRPL33, MRPL2, MRPL1, MRPL4, MRPL3, MRPS5, MRPL9, MRPS2, RPS18, RPS16, MRPS18A, RPS13, UBA52, MRPS17, MRPS16, MRPS11, MRPS10, RPS15A, RPL36, RPL37, MRPL10, RPS27, RPL30, RPS28, MRPL15, RPL32, RPL6, RPL31, RPL34, RPL9, RPL8, RPL3, RPL5, RPL7A, RPL10A, RPS24, RPSA, RPL26, RPL27, MRPS21, RPS6, RPS8, RPL28, RPS7, RPL23, RPL18A, RPL21, RPL37A |
| Spliceosome          | $5.5 \times 10^{-10}$ | 2.5 | $1.5 \times 10^{-7}$  | $7.7 \times 10^{-8}$  | $7.2 \times 10^{-7}$  | HNRNPA1L2, NCBP1, CHERP, SRSF10, TRA2B, U2AF2, U2SURP, TRA2A, CWC15, SNU13, SF3B6, XAB2, SF3B4, SF3B2, HNRNPA3, HNRNPM, SF3B1, TCERG1, PLRG1, USP39, DHX15, MAGOHB, HNRNPC, ACIN1, RBM25, PRPF40A, RBM22, SNRPA1, ALYREF, SF3A2, DDX5, HNRNPA1, SF3A1, RBMX, HNRNPU, PRPF6, SRSF2, EIF4A3, PPIE, SRSF5, PPIH, SRSF6, SLU7, SNRNP40, SNRPC, PUF60, PRPF38B, THOC1, PRPF38A, SNRPG                                                                      |
| Proteasome           | $6.1 \times 10^{-8}$  | 3.4 | $1.7 \times 10^{-5}$  | $5.7 \times 10^{-6}$  | $8.1 \times 10^{-5}$  | PSMA7, PSMB5, PSMA1, PSMB4, PSMD14, PSMB7, PSMD13, PSMC5, PSMC4, PSMD11, PSMA5, PSMC3, PSME2, PSMA4, PSMC2, PSMA3, POMP, PSMD2, PSMD3, PSME3, PSME4, PSMD7, PSMD8                                                                                                                                                                                                                                                                                     |
| Cell cycle           | $1.5 \times 10^{-7}$  | 2.3 | $4.3 \times 10^{-5}$  | $1.1 \times 10^{-5}$  | $2.0 \times 10^{-4}$  | E2F3, FZR1, E2F4, PKMYT1, TTK, CHEK1, PTTG1, CDC16, ZBTB17, CDC45, ORC4, MYC, ORC1, CUL1, BUB3, TFDP1, STAG1, CDC7, CDK1, ANAPC2, ANAPC5, RBL1, ANAPC4, TP53, SKP2, MCM2, SKP1, MCM3, MCM4, CDC27, WEE1, CDC25A, MCM6, CDC25B, CCNB1, HDAC1, PLK1, PCNA, BUB1B, MDM2, ANAPC7, SMC1A, GADD45B                                                                                                                                                          |
| RNA transport        | $8.6 \times 10^{-7}$  | 2.0 | $2.4 \times 10^{-4}$  | $4.9 \times 10^{-5}$  | $1.1 \times 10^{-3}$  | XPO1, NCBP1, RANGAP1, PNN, PRMT5, MAGOHB, NUP37, DDX20, ACIN1, TPR, TGS1, KPNB1, EIF2B4, EIF2B5, CLNS1A, NUP88, RAN, EIF2S3, NUP85, UBE2I, TACC3, EIF4G1, EIF4A3, EIF4G2, EIF4G3, AAAS, EIF4A2, EIF4A1, THOC6, NUP107, THOC1, NUP98, ELAC2, STRAP, PABPC4, NDC1, SUMO2, NUP214, EIF3B, EIF3G, EIF3E, NUP50, XPOT, GEMIN2, ALYREF, RNPS1, NXF1, CASC3, FXR1, EIF4B, SEC13, EIF4E2                                                                      |
| Base excision repair | $6.6 \times 10^{-6}$  | 3.4 | $1.9 \times 10^{-3}$  | $3.1 \times 10^{-4}$  | $8.8 \times 10^{-3}$  | APEX2, LIG1, NEIL3, POLE, NEIL1, MBD4, XRCC1, SMUG1, POLD4, MPG, MUTYH, POLE2, POLD1, POLD2, TDG, PCNA, PARP2                                                                                                                                                                                                                                                                                                                                         |
| DNA replication      | $2.6 \times 10^{-5}$  | 3.1 | $7.4 \times 10^{-3}$  | $1.1 \times 10^{-3}$  | $3.5 \times 10^{-2}$  | LIG1, POLE, RNASEH1, POLA2, MCM2, MCM3, MCM4, RNASEH2C, MCM6, RFC5, POLD4, RFC1, POLE2, POLD1, PRIM2, POLD2, PCNA                                                                                                                                                                                                                                                                                                                                     |



**Table S2. Primers used for site-directed mutagenesis, related to STAR methods.**

| Point Mutations or PCR Product | Amino Acid(s) | Primers | Sequences (5' – 3')                                   |
|--------------------------------|---------------|---------|-------------------------------------------------------|
| F147L/F149L                    | 147,149       | Forward | GGT CAT TCA AAG GGG CTT GGC CTT GTT CGT TTT ACG G     |
|                                |               | Reverse | CCG TAA AAC GAA CAA GGC CAA GCC CCT TTG AAT GAC C     |
| R151A                          | 151           | Forward | GGT TTG GCT TTG TTG CTT TTA CGG AAT ATG               |
|                                |               | Reverse | CAT ATT CCG TAA AAG CAA CAA AGC CAA ACC               |
| R151D                          | 151           | Forward | GGG GTT TGG CTT TGT TGA TTT TAC GGA ATA TG            |
|                                |               | Reverse | CAT ATT CCG TAA AAT CAA CAA AGC CAA ACC CC            |
| D247A                          | 247           | Forward | CTC TTT GTG GAG AGG CCT TGA TCA TTA AAG G             |
|                                |               | Reverse | CCT TTA ATG ATC AAG GCC TCT CCA CAA AGA G             |
| D247R                          | 247           | Forward | CTC TTT GTG GAG AGC GCT TGA TCA TTA AAG               |
|                                |               | Reverse | CTT TAA TGA TCA AGC GCT CTC CAC AAA GAG               |
| D247E                          | 247           | Forward | GTC TCT TTG TGG AGA GGA GTT GAT CAT TAA AGG AAT C     |
|                                |               | Reverse | GAT TCC TTT AAT GAT CAA CTC CTC TCC ACA AAG AGA C     |
| mPUM2                          | 255, 256, 259 | Forward | CAC AAA TTT GCC GCC GCT GTA GTA GCA AAG TGT GTT ACT C |
|                                |               | Reverse | GAG TAA CAC ACT TTG CTA CTA CAG CGG CGG CAA ATT TGT G |
| PP7                            | 1-283         | Forward | TCC AAA ACC ATC GTT CTT TCG G                         |
|                                |               | Reverse | TCC TCC TCC GCT TCC TCC ACT A                         |
| TDP43 N-terminus               | 1-106         | Forward | ATG TCT GAA TAT ATT CGG GTA ACC G                     |
|                                |               | Reverse | TAA ATC GGA TGT TTT CTG GAC T                         |
| TDP43 C-terminus               | 263-414       | Forward | AAG CAC AAT AGC AAT AGA CAG TTA G                     |
|                                |               | Reverse | TCC CCA GCC AGA AGA CTT AGA ATC C                     |
| TDP43(RRM1)                    | 107-176       | Forward | ATA GTG TTG GGT CTC CCA T                             |
|                                |               | Reverse | GCT TCT CAA AGG CTC ATC TT                            |
| TDP43(RRM2)                    | 191-262       | Forward | CTT CCT AAT TCT AAG CAA AGC CAA G -3'                 |
|                                |               | Reverse | AGG TTC GGC ATT GGA TAT ATG AAC GC – 3                |
| TDP43(WT)                      | 1-414         | Forward | GCT AGC GCC ACC ATG TCT GAA TAT ATT                   |
|                                |               | Reverse | ACC GGT CCC AAA CCT CTA CCG TCC CA                    |
| HaloTag                        | 1-296         | Forward | ATG GCA GAA ATC GGT ACT GG                            |
|                                |               | Reverse | CTA GGA AAT CTC GAG CGT CGA CA                        |
| TEV                            | 1-7           | Forward | GAG AAT CTT TAT TTT CAG GGC                           |
|                                |               | Reverse | GCC CTG AAA ATA AAG ATT CTC                           |
